# Supplementary material for: Assessing Ecological and Evolutionary Consequences of Growth-Accelerated Genetically Engineered Fishes
Source: Oxford University Press journal article supplement (doi:10.1093/biosci/biv068), 2015-06-06
Supplement: biv068_Supplementary_Data.zip [file biv068_Supplementary_Data.zip]

Archive with 2 entries (2 files):
- Supplemental Video 1.avi
- Supplementary Table 1 MS ID 14-0166.pdf
